# Excessive CpG island hypermethylation in cancer cell lines versus primary human malignancies

Dominic J. Smiraglia<sup>1,\*</sup>, Laura J. Rush<sup>1,2</sup>, Michael C. Frühwald<sup>1,7</sup>, Zunyan Dai<sup>1,3</sup>, William A. Held<sup>8</sup>, Joseph F. Costello<sup>9</sup>, James C. Lang<sup>4</sup>, Charis Eng<sup>1,5</sup>, Bin Li<sup>1</sup>, Fred A. Wright<sup>1</sup>, Michael A. Caligiuri<sup>1,6</sup> and Christoph Plass<sup>1</sup>

<sup>1</sup>Division of Human Cancer Genetics, Department of Molecular Virology, Immunology and Medical Genetics,

<sup>2</sup>Department of Veterinary Biosciences, <sup>3</sup>Department of Pathology, <sup>4</sup>Department of Otolaryngology, <sup>5</sup>Division of Human Genetics and <sup>6</sup>Division of Hematology and Oncology, Department of Internal Medicine, The Ohio State University, Columbus, OH 43210, USA, <sup>7</sup>Westfälische Wilhelms-Universität Münster, Klinik und Poliklinik für Kinderheilkunde, Pädiatrische Hämatologie/Onkologie, Münster 48149, Germany, <sup>8</sup>Department of Molecular and Cellular Biology, Roswell Park Cancer Institute, Elm and Carlton Streets, Buffalo, NY 14263, USA and <sup>9</sup>Department of Neurological Surgery and the Brain Tumor Research Center, University of California San Francisco, 2340 Sutter Street, Room N261, Box 0875, San Francisco, CA 94143-0875, USA

Received March 8, 2001; Revised and Accepted May 1, 2001

**Cancer cell lines are widely used in many types of cancer research, including studies aimed at understanding DNA hypermethylation of gene promoters in cancer. Hypermethylation of promoters is capable of repressing the expression of tumor suppressor genes and may play a role in the development and/or progression of cancer. Although both primary malignancies and cancer cell lines exhibit this epigenetic phenomenon, there has been no direct comparison between them. In order to address this question, we have utilized restriction landmark genomic scanning to measure the hypermethylation phenotypes of cancer cell lines and compared these data with the same analysis performed on primary malignancies. In all cases, cancer cell lines exhibit significantly higher levels of CpG island hypermethylation than the primary malignancies they represent. Colon cancer cell lines are most similar to their respective tumors, with only a 5-fold increase in hypermethylation, while head and neck squamous cell carcinoma cell lines show a 93-fold increase in hypermethylation. Furthermore, >57% of the loci methylated in cell lines are never methylated in 114 primary malignancies studied. Seventy percent of loci hypermethylated in cell lines are hypermethylated in lines from more than one type of cancer. These data indicate that most CpG island hypermethylation observed in cancer cell lines is due to an intrinsic property of cell lines as opposed to the malignant tissue from which they originated.**

## INTRODUCTION

CpG islands are GC-rich sequences usually located in promoters of genes, and normally unmethylated, with the exceptions of the inactive X chromosome, imprinted genes, and genes that are developmentally regulated, directly or indirectly, by methylation. Hypermethylation of these CpG islands contributes to the spectrum of genomic abnormalities found in human cancers and shows heterogeneity both within and among different tumor types (1–3). Through the recruitment of chromatin remodeling complexes (4), CpG island hypermethylation is capable of inactivating the expression of tumor suppressor genes and therefore contributing to carcinogenesis (1,5).

Cancer cell lines are widely used and important tools in cancer research, including DNA methylation studies and pharmacological studies aimed at manipulating DNA methylation (6,7). Mammalian cells grown in culture exhibit differences in DNA methylation compared with normal uncultured cells. Primary cultures approaching senescence demonstrate decreasing DNMT1 activity and decreasing 5-methylcytosine (5mC) content, while immortalized cultures do not (8,9). Established cancer cell lines, however, show significantly higher levels of 5mC than corresponding tumor tissues (10). In addition to global differences in 5mC content, CpG island hypermethylation occurs in both immortalized (11) and cancer cell lines, with as much as 61% of randomly cloned CpG islands exhibiting hypermethylation in one report (12).

Cancer cell lines clearly exhibit aberrant CpG island methylation (12)—as do primary malignancies—yet they differ from their respective malignant tissues in 5mC content (10). Therefore, the degree and quality of their similarity is in question. Nevertheless, there has been no comprehensive study comparing CpG island hypermethylation in cancer cell lines with the primary malignancies they represent. Restriction

\*To whom correspondence should be addressed at: The Ohio State University, Department of Molecular Virology, Immunology and Medical Genetics, Division of Human Cancer Genetics, 420 West 12th Avenue, Medical Research Facility, Room 470A, Columbus, OH 43210, USA; Tel: +1 614 292 6478; Fax: +1 614 688 4761; Email: Smiraglia.1@postbox.acs.ohio-state.edu

landmark genomic scanning (RLGS) has previously been used to demonstrate increasing hypermethylation in mouse cell lines with respect to normal brain tissue, with increasing passage in culture (13). Our recent application of RLGS (14–16) to assess the methylation state of 1184 CpG islands in 114 human malignancies of eight different types (2,17) affords a unique opportunity to compare the hypermethylation phenotypes of primary malignancies with their respective cell lines. Here we assess the methylation status of these same 1184 CpG islands in 24 cancer cell lines—three for each of the eight cancer types. Our data indicate significant qualitative and quantitative differences between established cancer cell lines and their corresponding malignant tissues.

## RESULTS

### Quantitative comparison

In order to determine whether CpG island hypermethylation in cell lines is similar to that seen in primary malignancies, RLGS profiles were prepared from established cell lines for the following eight malignancies: breast (BRE), colon (CLN), lung (LNG) and head and neck squamous cell carcinomas (HN), glioblastoma (GLI), acute myeloid leukemia (LEU), medulloblastoma (PNET) and testicular germ cell tumors (TST). RLGS profiles were analyzed by assessing the presence or absence of 1184 RLGS fragments previously determined to be present and non-polymorphic in peripheral blood lymphocyte (PBL) DNA (2). Absence of an RLGS fragment is indicative of DNA methylation of the corresponding CpG island (2). Portions of RLGS profile analyses are illustrated in Figure 1, indicating three prominent methylation events in the primary tumor and 15 in the corresponding cell line. Within each cell line type, the loss pattern is not uniform—specific fragments show significantly elevated loss [ $P < 0.0001$  for each type; statistical methods are detailed in a previous report (2)]. The degree of hypermethylation in each cell line is shown in Table 1. RLGS fragment loss in these cell lines ranges from 60–95 fragments in TST cell lines, to 317–569 in LEU cell lines. As shown in Table 2, most methylation events occurred in only one of the three cell lines for each type. Methylation in all three cell lines of a given type was seen in as many as 30% of the loci (CLN) and as few as 4% of the loci

**Table 1.** RLGS analysis of fragment loss in 24 established cancer cell lines

| Cancer cell lines <sup>a</sup> |      | Methylated loci | % Methylated loci <sup>b</sup> |
|--------------------------------|------|-----------------|--------------------------------|
| NCCIT                          | TST  | 60              | 5                              |
| DAOY                           | PNET | 63              | 5                              |
| SCC-4                          | HN   | 73              | 6                              |
| NTERA-1                        | TST  | 85              | 7                              |
| SCC-9                          | HN   | 89              | 8                              |
| TERA1                          | TST  | 95              | 8                              |
| T47D                           | BRE  | 111             | 9                              |
| D283 MED                       | PNET | 111             | 9                              |
| D341 MED                       | PNET | 112             | 9                              |
| SCC-25                         | HN   | 116             | 10                             |
| HS578T                         | BRE  | 123             | 10                             |
| H522                           | LNG  | 135             | 11                             |
| MDA-435                        | BRE  | 151             | 13                             |
| H125                           | LNG  | 162             | 14                             |
| DLD-1B                         | CLN  | 179             | 15                             |
| H1299                          | LNG  | 198             | 17                             |
| LN235                          | GLI  | 200             | 17                             |
| DLD-2                          | CLN  | 206             | 17                             |
| COLON A                        | CLN  | 213             | 18                             |
| T98                            | GLI  | 255             | 22                             |
| U251                           | GLI  | 294             | 25                             |
| TI-1                           | LEU  | 317             | 27                             |
| Kasumi-1                       | LEU  | 338             | 29                             |
| HL-60                          | LEU  | 569             | 48                             |

<sup>a</sup>The tumor type represented by the cell lines is listed to the right.

<sup>b</sup>Out of a total of 1184 analyzed RLGS fragments per RLGS profile.

(PNET). Comparison of the mean levels of CpG island methylation in our primary tumor data sets (2,17) with those found in the corresponding established cancer cell lines demonstrates that CpG island hypermethylation is greatly elevated in cell lines (Fig. 2) and varies significantly across

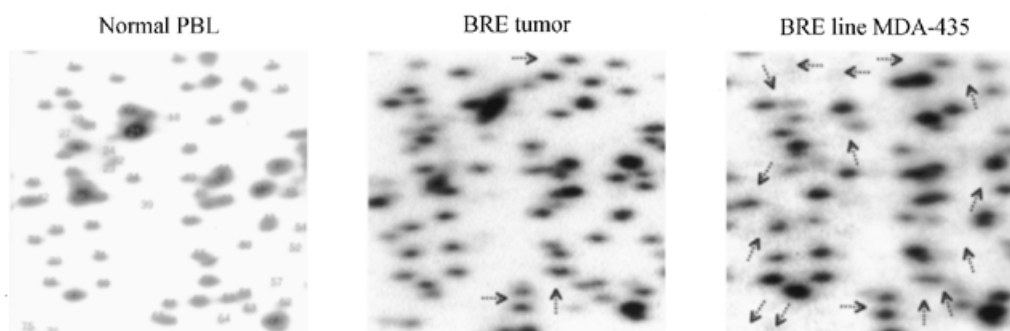

**Figure 1.** RLGS analysis was performed as described previously (16). Portions of RLGS profiles for normal peripheral blood lymphocytes (PBL), a primary breast carcinoma (BRE), and a breast cancer cell line (MDA-435) are shown. 1184 non-polymorphic fragments from the PBL profile (2) were assessed. Arrows in BRE tumor and BRE cell line profiles indicate methylation.

**Table 2.** Summary of locus methylation in cell lines

| Cell line type | Total loci methylated in at least one line | Methylated in 1 of 3 lines (%) | Methylated in 2 of 3 lines (%) | Methylated in 3 of 3 lines (%) |
|----------------|--------------------------------------------|--------------------------------|--------------------------------|--------------------------------|
| BRE            | 277                                        | 67                             | 27                             | 6                              |
| CLN            | 323                                        | 45                             | 25                             | 30                             |
| GLI            | 477                                        | 58                             | 28                             | 14                             |
| HN             | 189                                        | 64                             | 24                             | 12                             |
| LEU            | 749                                        | 51                             | 35                             | 14                             |
| LNG            | 320                                        | 59                             | 28                             | 13                             |
| PNET           | 220                                        | 74                             | 22                             | 4                              |
| TST            | 163                                        | 63                             | 26                             | 11                             |

types (Kruskal–Wallis test,  $P < 0.004$ ). Interestingly, however, the relative degree of hypermethylation in cell lines is positively correlated with their respective malignancies (Fig. 2). TST, HN, PNET and BRE tumors exhibit the lowest mean levels of hypermethylation, as do their respective cell lines, while CLN, GLI, LNG and LEU show the highest. As many as 88% (LEU) but minimally 41% (BRE) of the CpG islands hypermethylated in primary malignancies are also hypermethylated in their respective cell lines (Fig. 2).

### Qualitative comparison

Analysis of all RLGS fragments hypermethylated in 114 malignancies and 24 cancer cell lines (Fig. 3A) shows that 57% are hypermethylated exclusively in cell lines. This demonstrates a high intrinsic level of hypermethylation in cell lines, which is not present in non-cultured primary neoplasias. Of the RLGS fragments that are hypermethylated in any of the 24 cell lines, 70% are hypermethylated in lines from multiple malignancies, with 2% lost in lines from all eight types and 32% lost in four or more types. These data suggest that a large portion of this CpG island hypermethylation is a consequence of proper-

ties common to cancer cell lines, but different from factors specific to the tissue of origin. The total number of RLGS fragments lost in each individual tumor type and respective cell line is shown in Figure 3B, with the majority of hypermethylation appearing in cell lines representing multiple tumor types. Less than 9% of the total cell line hypermethylation for each malignancy is unique to lines of that type (except for LEU lines, which show the highest hypermethylation rate), again demonstrating that most cancer cell line hypermethylation is not dependent upon the tissue of origin. This is further illustrated in Table 3, showing 23 cloned RLGS fragments with homology to known genes. In nearly all cases, the genes are methylated in more cell line types than tumor types. One such example is the *OTX1* gene (RLGS fragment 2D20) which is methylated in cell lines representing all eight tumor types, but primary neoplasias from only the colon and lung.

### DISCUSSION

In this report, we have addressed the questions of quantitative and qualitative similarity in the hypermethylation phenotypes between primary malignancies and their corresponding

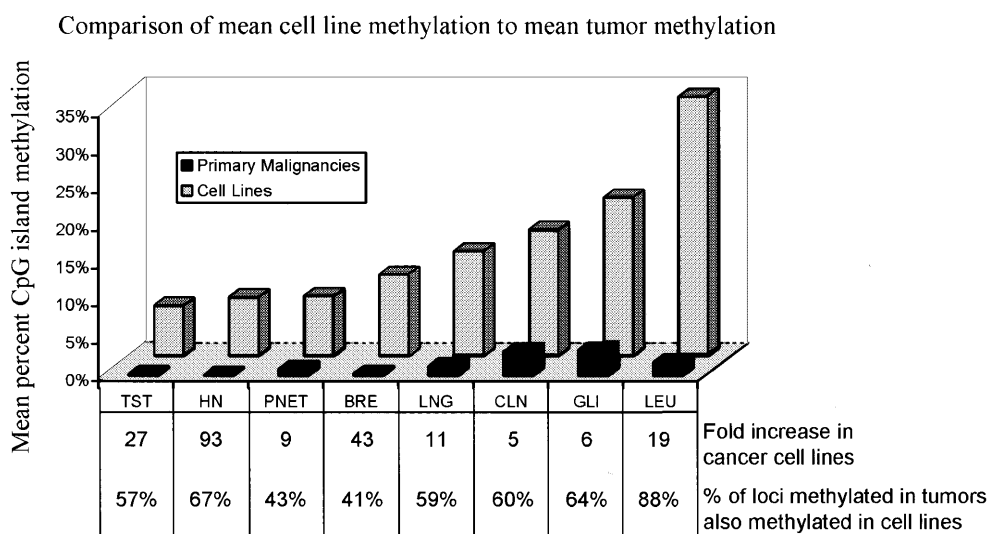

**Figure 2.** Mean CpG island hypermethylation compared among cell lines and respective malignant tissues (2), with hypermethylation fold increase in cell lines and percentage of hypermethylated loci in primary malignancies that are preserved in corresponding cell lines.

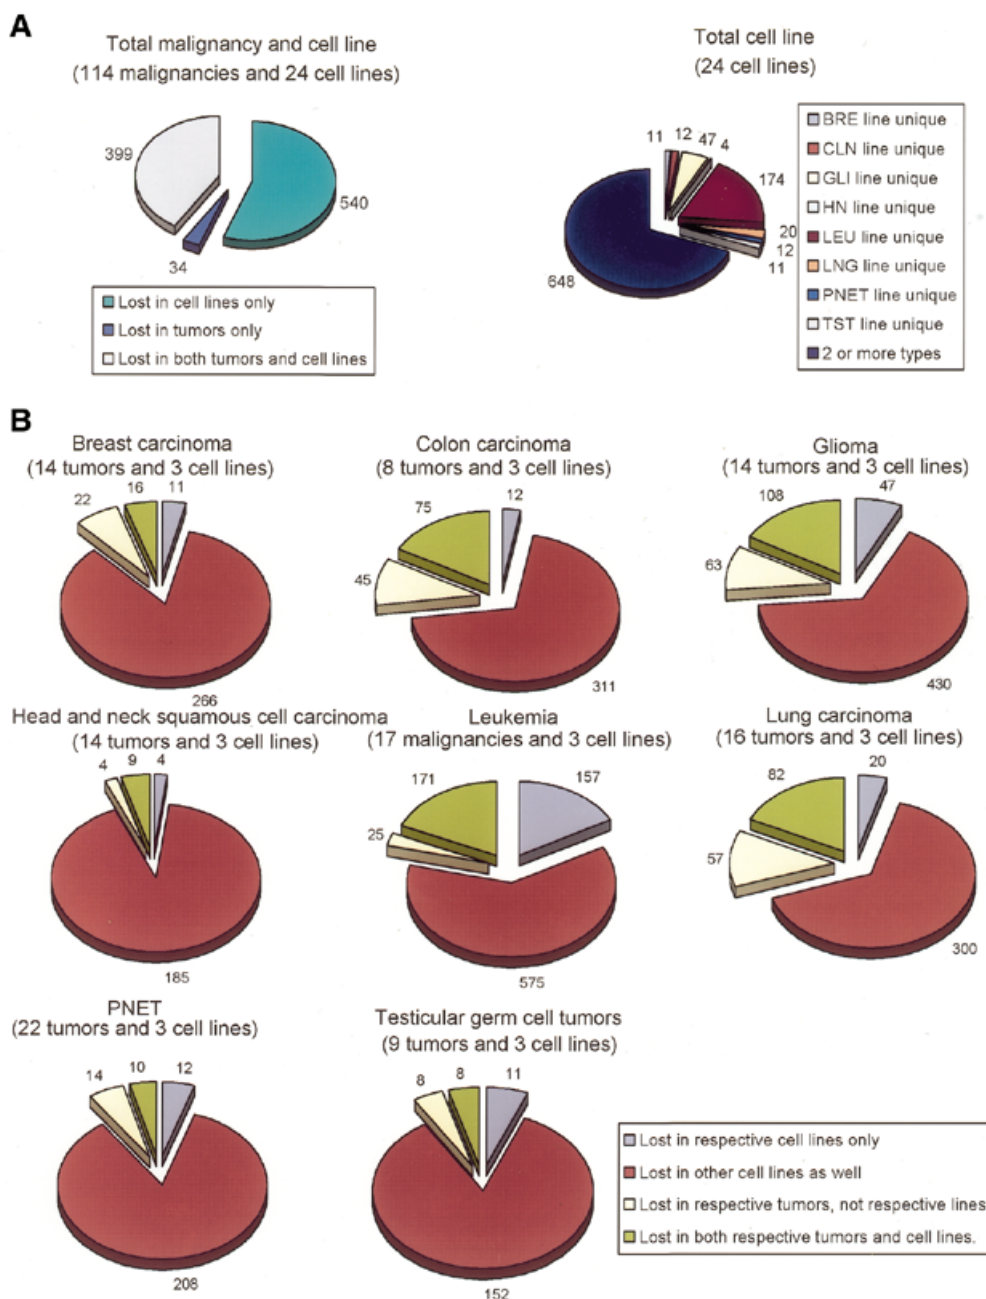

**Figure 3.** Distribution of RLGS fragment loss. Distribution of total (A) or individual malignancy (B) RLGS fragments lost in cell lines and/or malignancies.

established cancer cell lines. We have taken advantage of the unique ability of RLGS to provide a ‘snapshot’ of the CpG island hypermethylation phenotype in the genomes of primary malignancies and cell lines by assessing the methylation state of 1184 CpG islands in each sample. Through comparison of the data sets produced for 114 primary malignancies and 24 cell lines representing each of these malignancies, our analysis clearly demonstrates that cancer cell lines have much higher levels of CpG island hypermethylation than corresponding malignant tissues.

Interestingly, the degrees of the increased CpG island hypermethylation phenotypes in cell lines are not uniform

across the types of cancers though they are positively correlated with the primary malignancies (Spearman’s rank correlation 0.81,  $P < 0.0001$ ). Cancer types that tend to exhibit relatively high levels of CpG island methylation also show relatively high levels in representative cell lines. The same is true of cancer types exhibiting relatively low levels of CpG island hypermethylation. This suggests that although the cell lines representing a particular cancer demonstrate much higher overall levels of hypermethylation, they have retained a measure of tissue-of-origin specificity limiting how much more hypermethylation they are capable of, or can withstand. TST cell lines, for example, seem to have a lower capacity for

**Table 3.** Cloned RLGS fragments methylated in various cell line and tumor types

| RLGS fragment | Reference <sup>a</sup> | Gene            |                                                               | Tumor types methylated <sup>b</sup> | Cell line types methylated <sup>c</sup> |
|---------------|------------------------|-----------------|---------------------------------------------------------------|-------------------------------------|-----------------------------------------|
| 1G20          | –                      | <i>SOX2</i>     | SRY-Box 2                                                     | LEU                                 | CLN, LEU                                |
| 2B53          | –                      | <i>NCL</i>      | Nucleolin                                                     | HN                                  | CLN, GLI                                |
| 2D14          | (17,19)                | <i>CD8B</i>     | T-cell glycoprotein CD8 beta                                  | HN, LEU                             | BRE, CLN, GLI, LEU, LNG, PNET, TST      |
| 2D20          | (2)                    | <i>OTX1</i>     | Orthodenticle ( <i>Drosophila</i> ) homolog 1                 | CLN, LNG                            | BRE, CLN, GLI, HN, LEU, LNG, PNET, TST  |
| 2E24          | (19)                   | <i>MCT3</i>     | Monocarboxylate transporter 3                                 | GLI, LEU, LNG, PNET                 | BRE, CLN, GLI, HN, LEU, LNG, PNET, TST  |
| 2E25          | –                      | <i>FKBP8</i>    | FK506-binding protein 8                                       | BRE                                 | TST                                     |
| 2F50          | (2,19)                 | <i>POU3F1</i>   | POU domain class 3, transcription factor 1                    | GLI, LEU                            | BRE, GLI, LEU                           |
| 3B36          | (19)                   | <i>CYP1B1</i>   | Cytochrome P450, subfamily I, polypeptide 1                   | CLN, GLI, LEU, LNG, PNET            | BRE, CLN, GLI, HN, LEU, LNG, TST        |
| 3B55          | –                      | <i>TBR1</i>     | T-Box, brain, 1                                               | BRE, CLN, LNG, PNET                 | CLN, GLI, LEU, TST                      |
| 3C1           | (2,17,19)              | <i>GNAL</i>     | G-alpha olfactory                                             | CLN, GLI, LEU, LNG                  | BRE, CLN, GLI, LEU, LNG, TST            |
| 3D21          | –                      | <i>LOC51193</i> | Zinc finger protein ANC_2H01                                  | LEU                                 | None                                    |
| 3D24          | –                      | <i>USP6</i>     | Ubiquitin-specific protease 6                                 | GLI, LEU, LNG                       | BRE, LNG, PNET, TST                     |
| 3E55          | (17,19)                | <i>IPF1</i>     | Insulin promoter factor 1                                     | LNG                                 | CLN, GLI, HN, LEU, LNG, PNET, TST       |
| 3E59          | –                      | <i>BNPI</i>     | Brain-specific Na-dependent inorganic phosphate cotransporter | LNG                                 | CLN, LEU                                |
| 3F64          | –                      | <i>GAK</i>      | Cyclin G associated kinase                                    | LNG                                 | GLI, HN, LEU, LNG                       |
| 3F72          | (19)                   | <i>GPR88</i>    | G-protein coupled receptor 88                                 | LEU, LNG                            | CLN, LEU                                |
| 3G46          | –                      | <i>DPAGT2</i>   | GlcNac-1-P transferase                                        | None                                | LEU                                     |
| 4B56          | –                      | <i>XT3</i>      | Orphan transporter XT3                                        | BRE, LEU                            | BRE, GLI, LEU                           |
| 4F15          | (17)                   | <i>BMP3B</i>    | Bone morphogenetic protein-3b                                 | CLN, LNG                            | GLI, LEU, LNG                           |
| 5D9           | –                      | <i>NGEF</i>     | Neuronal guanine nucleotide exchange factor                   | HN, LNG, TST                        | BRE, CLN, GLI, LEU, LNG, PNET, TST      |
| 5E25          | –                      | <i>FMN2</i>     | Formin 2-like                                                 | CLN, LNG                            | CLN, HN, LEU, PNET                      |
| 5E34          | (2,15,19)              | <i>WIT1</i>     | Wilms' tumor associated protein                               | GLI, LEU                            | BRE, CLN, LEU, LNG, PNET, TST           |
| 5E4           | –                      | <i>MYO9B</i>    | Myosin IX B                                                   | BRE, GLI, LEU, LNG                  | BRE, CLN, GLI, HN, LEU, LNG, TST        |

<sup>a</sup>References where the RLGS fragment was first reported to be methylated.

<sup>b</sup>Breast carcinoma (BRE), *n* = 14; colon carcinoma (CLN), *n* = 8; glioblastoma (GLI), *n* = 14; head and neck squamous cell carcinoma (HN), *n* = 14; acute myeloid leukemia (LEU), *n* = 17; lung carcinoma (LNG), *n* = 16; medulloblastoma (PNET), *n* = 22; testicular germ cell tumors (TST), *n* = 9.

<sup>c</sup>Three cell lines from each of the eight tumor types.

hypermethylation than LEU cell lines, which is reflective of the primary malignancies. It is unclear whether the limiting factor explaining why TST lines do not hypermethylate their genomes as much as LEU lines is a reflection of their ability to hypermethylate, or their lack of tolerance to hypermethylation.

Analysis of which loci become hypermethylated in primary malignancies and their respective cell lines is striking. More than 57% (540 loci) of the loci that become hypermethylated do so in cell lines but in none of the 114 primary malignancies. Even taking into account the higher overall level of hypermethylation in cell lines, it is remarkable that such a large portion of hypermethylation events is exclusive to cell lines. Furthermore, the majority of cell line hypermethylation is common to multiple lines independent of the tissue of origin. Seventy percent (648 events) of the hypermethylation events which occur in any cell line occur in cell lines representing more than one type of cancer. Thus, it appears that the majority

of the hypermethylation events seen in cancer cell lines are related to an intrinsic property of mammalian cells grown in culture rather than dependent upon the cell of origin. A portion of this may reflect the repression of both non-essential genes as well as genes involved in terminal differentiation (12), thus conferring an *in vitro* growth advantage. It is likely that repression of many of these genes could not be tolerated *in vivo*.

Despite the above observations, cancer cell lines do in fact show some evidence of hypermethylation specificity as most methylation events in primary malignancies also occur in their respective cell lines. Only two cancer types, PNET and BRE, have <50% of the loci (9/21 and 12/29, respectively) methylated in primary tumors that are also methylated in their respective cell lines. Thus, similar to the quantitative analysis described above, these qualitative data also indicate some retention of tissue-of-origin characteristics in their hypermethylation phenotypes. Given that CpG island hypermethylation is thought to contribute to repression of gene expression, this

retention of tissue-of-origin hypermethylation characteristics might be reflected in the set of genes expressed in these cell lines. This idea is supported by cDNA microarray data showing that cell lines from individual cancer types cluster together based on expression profiling (18).

In conclusion, the CpG island hypermethylation found in cell lines is significantly different from that seen in the primary malignancies they represent. It appears that the majority of hypermethylation events in cell lines can be thought of as 'background' events, which have little to do with the cancer, but much to do with the fact that these cells are growing in culture. Nevertheless, it is clear that these cell lines have retained some hypermethylation characteristics from their tumor of origin, particularly with regard to the degree of hypermethylation, and to a lesser extent, with regard to which loci become hypermethylated. These data have strong implications for certain types of DNA methylation research performed with cancer cell lines as the main experimental system. When cell lines are used to identify targets of promoter hypermethylation in a particular cancer type, these results indicate that 66% (LNG) to 92% (HN) of the loci identified are lost only in cell lines, not in cancer. Thus, we conclude that, given their high intrinsic level of CpG island hypermethylation, cancer cell lines are likely to be a poor resource for identifying novel targets of DNA hypermethylation involved in oncogenesis. However, since they often preserve hypermethylation from their corresponding tumors, they are indeed useful resources to study hypermethylation and its consequences at specific loci identified in tumors.

## MATERIALS AND METHODS

### Cell lines

The glioma cell line LN235 was kindly provided by Nicolas de Tribolet (Lausanne, Switzerland). The leukemia cell lines (TI1, HL60 and Kasumi1) were provided by one of the co-authors (M.A.C.). All other cell lines were originally obtained through ATCC (Rockland, MD). The breast carcinoma cell lines (T47D, HS578T and MDA4355) and the colon carcinoma cell lines (LN235, DLD2 and Colon A) were grown interchangeably in Dulbecco's modified Eagle's medium (DMEM) or mammary epithelial cell basal medium (Gibco BRL, Rockville, MD) with 5% fetal bovine serum. The glioma cell lines (T98, U251 and LN235) which were originally derived from human glioblastomas (WHO grade IV) were grown in minimal essential medium with 10% fetal calf serum (Gibco BRL). The head and neck squamous cell carcinoma cell lines (SCC4, SCC9 and SCC25) were grown in a mixture of 50% DMEM with 10% fetal bovine serum and 50% defined keratinocyte-SFM medium (Gibco BRL). The leukemia cell lines (TI1, HL60 and Kasumi1) were grown in RPMI-1640 medium with 20% fetal bovine serum (Gibco BRL), 1% antibiotic-antifungal agent (Gibco BRL) and 1% anti-PPLO agent (Gibco BRL). The lung carcinoma cell lines (H125, H522 and H1299) were grown in RPMI-1640 medium with 5% fetal calf serum. The medulloblastoma cell lines (Daoy, D283 Med and D341 Med) were grown in high glucose DMEM supplemented with 4 mM L-glutamine and 10% heat-inactivated human umbilical cord serum. The testicular non-seminoma cell line TERA1 was grown in McCoy's 5A medium modified (Gibco BRL) with

15% fetal bovine serum. The non-seminoma cell lines NCCIT and NTERA1 were grown in RPMI-1640 medium with 10% fetal bovine serum. All cell lines were grown at 37°C in a 5% CO<sub>2</sub> humidified atmosphere.

### Standard RLGS procedure

RLGS on genomic DNA was performed as described by Okazaki *et al.* (14) and modified as described previously (16).

## ACKNOWLEDGEMENTS

This work was supported in part by grant nos P30CA16058, DE13123 and CA80912 from the National Cancer Institute (Bethesda, MD), grant no. GM58934 from the National Institute of Health (Bethesda, MD), the Comprehensive Cancer Center experimental therapeutics seed fund program and by grants Deutsche Krebshilfe grant 101699-Fr1 and DFG grant FR 1516 1/1 (M.C.F.). D.J.S. and L.J.R. were supported in part by the T32 CA09338-20 Oncology Training Grant from the National Cancer Institute.

## REFERENCES

1. Baylin, S.B., Herman, J.G., Graff, J.R., Vertino, P.M. and Issa, J.P. (1998) Alterations in DNA methylation: a fundamental aspect of neoplasia. *Adv. Cancer Res.*, **72**, 141–196.
2. Costello, J.F., Fruhwald, M.C., Smiraglia, D.J., Rush, L.J., Robertson, G.P., Gao, X., Wright, F.A., Feramisco, J.D., Peltomaki, P., Lang, J.C. *et al.* (2000) Aberrant CpG-island methylation has non-random and tumour-type-specific patterns. *Nat. Genet.*, **24**, 132–138.
3. Jones, P.A. and Gonzalzo, M.L. (1997) Altered DNA methylation and genome instability: a new pathway to cancer? *Proc. Natl Acad. Sci. USA*, **94**, 2103–2105.
4. Ng, H.H. and Bird, A. (1999) DNA methylation and chromatin modification. *Curr. Opin. Genet. Dev.*, **9**, 158–163.
5. Robertson, K.D. and Jones, P.A. (2000) DNA methylation: past, present and future directions. *Carcinogenesis*, **21**, 461–467.
6. Karpf, A.R., Peterson, P.W., Rawlins, J.T., Dalley, B.K., Yang, Q., Albertsen, H. and Jones, D.A. (1999) Inhibition of DNA methyltransferase stimulates the expression of signal transducer and activator of transcription 1, 2, and 3 genes in colon tumor cells. *Proc. Natl Acad. Sci. USA*, **96**, 14007–14012.
7. Jones, P.A., Taylor, S.M. and Wilson, V.L. (1983) Inhibition of DNA methylation by 5-azacytidine. *Recent Results Cancer Res.*, **84**, 202–211.
8. Vertino, P.M., Issa, J.P., Pereira-Smith, O.M. and Baylin, S.B. (1994) Stabilization of DNA methyltransferase levels and CpG island hypermethylation precede SV40-induced immortalization of human fibroblasts. *Cell Growth Differ.*, **5**, 1395–1402.
9. Wilson, V.L. and Jones, P.A. (1983) DNA methylation decreases in aging but not in immortal cells. *Science*, **220**, 1055–1057.
10. Flatau, E., Bogenmann, E. and Jones, P.A. (1983) Variable 5-methylcytosine levels in human tumor cell lines and fresh pediatric tumor explants. *Cancer Res.*, **43**, 4901–4905.
11. Vertino, P.M., Yen, R.W., Gao, J. and Baylin, S.B. (1996) *De novo* methylation of CpG island sequences in human fibroblasts overexpressing DNA (cytosine-5-)-methyltransferase. *Mol. Cell. Biol.*, **16**, 4555–4565.
12. Antequera, F., Boyes, J. and Bird, A. (1990) High levels of *de novo* methylation and altered chromatin structure at CpG islands in cell lines. *Cell*, **62**, 503–514.
13. Kawai, J., Hirose, K., Fushiki, S., Hirotsune, S., Ozawa, N., Hara, A., Hayashizaki, Y. and Watanabe, S. (1994) Comparison of DNA methylation patterns among mouse cell lines by restriction landmark genomic scanning. *Mol. Cell. Biol.*, **14**, 7421–7427.
14. Okazaki, Y., Okuizumi, H., Sasaki, N., Ohsumi, T., Kuromitsu, J., Hirota, N., Muramatsu, M. and Hayashizaki, Y. (1995) An expanded system of restriction landmark genomic scanning (RLGS Ver. 1.8). *Electrophoresis*, **16**, 197–202.
15. Plass, C., Yu, F., Yu, L., Strout, M.P., El-Rifai, W., Elonen, E., Knuutila, S., Marcucci, G., Young, D.C., Held, W.A. *et al.* (1999)

- Restriction landmark genome scanning for aberrant methylation in primary refractory and relapsed acute myeloid leukemia; involvement of the WIT-1 gene. *Oncogene*, **18**, 3159–3165.
16. Smiraglia, D.J., Frühwald, M.C., Costello, J.F., McCormick, S.P., Dai, Z., Peltomäki, P., O'Dorisio, M.S., Cavenee, W.K. and Plass, C. (1999) A new tool for the rapid cloning of amplified and hypermethylated human DNA sequences from restriction landmark genome scanning gels. *Genomics*, **58**, 254–262.
  17. Dai, Z., Lakshmana, R.R., Smiraglia, D.J., Rush, L.J., Frühwald, M.C., Ross, P., Zhu, W., Otterson, G.A. and Plass, C. (2001) Global methylation profiling of lung cancer specimens reveals novel methylated genes. *Neoplasia*, in press.
  18. Ross, D.T., Scherf, U., Eisen, M.B., Perou, C.M., Rees, C., Spellman, P., Iyer, V., Jeffrey, S.S., Van de Rijn, M., Waltham, M. *et al.* (2000) Systematic variation in gene expression patterns in human cancer cell lines. *Nat. Genet.*, **24**, 227–235.
  19. Rush, L.J., Dai, Z., Smiraglia, D.J., Gao, X., Wright, F.A., Frühwald, M., Costello, J.F., Held, W.A., Yu, L., Krahe, R. *et al.* (2001) Variable and nonrandom CpG island hypermethylation in *de novo* acute myeloid leukemia with prevalence of chromosome 11 loci. *Blood*, **97**, 3226–3233.
